# Supplementary material for: Characterization and Clinical Relevance of ALDHbright Populations in Prostate Cancer
Source: Oxford University Press journal article supplement (doi:10.1158/1078-0432.ccr-12-2857), 2013-08-23
Supplement: 10780432ccr122857-sup-table_1.pdf [file 10780432ccr122857-sup-table_1.pdf]

---

**TABLE S1. Characteristics of PCa patients (n=71)**

---

|                      | N patients (%) |
|----------------------|----------------|
| <b>Stage</b>         |                |
| pT2a                 | 6 (8.5%)       |
| pT2b                 | 2 (2.8%)       |
| pT2c                 | 38 (53.5%)     |
| pT3a                 | 14 (19.7%)     |
| pT3b                 | 10 (14.1%)     |
| NA                   | 1 (1.4%)       |
| <b>Gleason score</b> |                |
| 5-6                  | 17 (23.9%)     |
| 7                    | 41 (57.8%)     |
| 8                    | 8 (11.3%)      |
| 9                    | 5 (7.0%)       |
| <b>Nodal status</b>  |                |
| N0                   | 55 (77.5%)     |
| Nx                   | 4 (5.6%)       |
| N1                   | 5 (7.0%)       |
| NA                   | 7 (9.9%)       |

---

NA: not available
